# Supplementary material
Source: publisher site journal article supplement (https://www.degruyterbrill.com/publication/isbn/9783486710755/downloadAsset/9783486710755_Inhaltsverzeichnis.pdf)
Supplement: Supplementary file 1 [file 9783486710755_Inhaltsverzeichnis.pdf]

## Inhalt

|         |                                                                                                  |    |
|---------|--------------------------------------------------------------------------------------------------|----|
|         | Vorwort                                                                                          | 1  |
| 1       | Einführung                                                                                       | 2  |
| 2       | Planung von Versuchen und Erhebungen und Beschreibung einfacher Anlagen                          | 7  |
| 2.1     | Grundbegriffe                                                                                    | 7  |
| 2.2     | Einführung in die Prinzipien der Versuchsplanung                                                 | 9  |
| 2.3     | Mehrfache Messungen, das Prinzip der Wiederholung                                                | 12 |
| 2.4     | Schichtung und Blockbildung zur Eliminierung der Effekte von Störfaktoren                        | 13 |
| 2.4.1   | Grundbegriffe                                                                                    | 13 |
| 2.4.2   | Prinzipien der Blockbildung und Schichtung                                                       | 15 |
| 2.5     | Randomisierung                                                                                   | 19 |
| 2.5.1   | Randomisierung bei Erhebungen - Zufallsauswahl                                                   | 19 |
| 2.5.2   | Randomisierung in Versuchsanlagen - zufällige Zuordnung                                          | 23 |
| 2.6     | Blockanlagen                                                                                     | 25 |
| 2.6.1   | Grundbegriffe                                                                                    | 25 |
| 2.6.2   | Vollständig balancierte unvollständige Blockanlagen                                              | 27 |
| 2.7     | Faktorielle Pläne                                                                                | 29 |
| 2.8     | Optimale Wahl des Untersuchungsumfanges                                                          | 31 |
| 3       | Planung und Auswertung vollständig randomisierter Versuchsanlagen                                | 32 |
| 3.1     | Punktschätzung von Parametern                                                                    | 34 |
| 3.1.1   | Punktschätzung der Parameter einer Normalverteilung                                              | 38 |
| 3.1.2   | Punktschätzung des Parameters $p$ einer Binomialverteilung                                       | 40 |
| 3.1.3   | Punktschätzung bei Erhebungen                                                                    | 41 |
| 3.2     | Intervallschätzung                                                                               | 46 |
| 3.2.1   | Konfidenzintervalle für die Parameter einer Verteilung                                           | 47 |
| 3.2.1.1 | Konfidenzintervalle für den Erwartungswert einer Normalverteilung                                | 47 |
| 3.2.1.2 | Konfidenzintervalle für den Erwartungswert einer Normalverteilung bei Einfluss eines Störfaktors | 53 |
| 3.2.1.3 | Konfidenzintervalle für Mittelwert und Summe aus Erhebungen                                      | 56 |
| 3.2.1.4 | Konfidenzintervall für die Varianz einer Normalverteilung                                        | 56 |
| 3.2.1.5 | Konfidenzintervalle für Wahrscheinlichkeiten                                                     | 58 |
| 3.2.2   | Konfidenzintervalle für die Differenz der Erwartungswerte zweier Normalverteilungen              | 62 |
| 3.2.2.1 | Mittelwertdifferenzen von Normalverteilungen - gepaarte Beobachtungen                            | 62 |
| 3.2.2.2 | Mittelwertdifferenzen von Normalverteilungen - zwei unabhängige Stichproben                      | 64 |
| 3.3     | Auswahlverfahren                                                                                 | 68 |
| 3.4     | Hypothesenprüfung                                                                                | 72 |
| 3.4.1   | Prüfung von Hypothesen über den Mittelwert einer Normalverteilung                                | 76 |
| 3.4.2   | Prüfung von Hypothesen über die Mittelwertdifferenz zweier Normalverteilungen                    | 80 |
| 3.4.2.1 | Gepaarte Beobachtungen                                                                           | 80 |
| 3.4.2.2 | Unabhängige Stichproben                                                                          | 81 |
| 3.4.3   | Vergleich der Varianzen zweier Normalverteilungen                                                | 88 |
| 3.4.4   | Vergleich zweier Wahrscheinlichkeiten bei unabhängigen Stichproben                               | 92 |

|         |                                                                                                    |     |
|---------|----------------------------------------------------------------------------------------------------|-----|
| 3.4.5   | Äquivalenztests                                                                                    | 98  |
| 4.      | Varianzanalyse                                                                                     | 100 |
| 4.1     | Einfache Varianzanalyse                                                                            | 101 |
| 4.1.1   | Einfache Varianzanalyse-Modell I                                                                   | 101 |
| 4.1.2   | Einfache Varianzanalyse-Modell II                                                                  | 106 |
| 4.2     | Zweifache Varianzanalyse                                                                           | 109 |
| 4.2.1   | Zweifache Varianzanalyse - Kreuzklassifikation                                                     | 109 |
| 4.2.1.1 | Zweifache Varianzanalyse - Kreuzklassifikation - Modell I                                          | 111 |
| 4.2.1.2 | Zweifache Varianzanalyse - Kreuzklassifikation - Modell II                                         | 115 |
| 4.2.1.3 | Zweifache Varianzanalyse - Kreuzklassifikation - gemischtes Modell                                 | 119 |
| 4.2.1.4 | Zweifache Varianzanalyse - Kreuzklassifikation - Blockanlagen                                      | 122 |
| 4.2.2   | Zweifache Varianzanalyse - Hierarchische Klassifikation                                            | 125 |
| 4.2.2.1 | Zweifache Varianzanalyse - Hierarchische Klassifikation - Modell I                                 | 128 |
| 4.2.2.2 | Zweifache Varianzanalyse - Hierarchische Klassifikation - Modell II                                | 132 |
| 4.2.2.3 | Zweifache Varianzanalyse - Hierarchische Klassifikation - gemischtes Modell, A fest und B zufällig | 135 |
| 4.2.2.4 | Zweifache Varianzanalyse - Hierarchische Klassifikation - gemischtes Modell, B fest und A zufällig | 136 |
| 4.2.3   | Hinweise zur Bearbeitung höherer Klassifikationen                                                  | 137 |
| 4.3     | Multiple Mittelwertvergleiche                                                                      | 139 |
| 4.3.1   | Paarweise Mittelwertvergleiche zwischen $k$ Grundgesamtheiten                                      | 140 |
| 4.3.1.1 | Multipler $t$ -Test                                                                                | 143 |
| 4.3.1.2 | Tukey-Test                                                                                         | 144 |
| 4.3.2   | Multiple Vergleiche mit einer Standardgrundgesamtheit                                              | 145 |
| 4.3.2.1 | Multipler $t$ -Test                                                                                | 146 |
| 4.3.2.2 | Dunnett-Test                                                                                       | 147 |
| 4.3.3   | Übersicht über minimale Stichprobenumfänge                                                         | 148 |
| 5.      | Regressionsanalyse                                                                                 | 149 |
| 5.1     | Punktwolken                                                                                        | 152 |
| 5.2     | Modell I und Modell II der Regressionsanalyse                                                      | 154 |
| 5.3     | Parameterschätzung mit Hilfe der Methode der kleinsten Quadrate                                    | 159 |
| 5.4     | Einfache lineare Regression                                                                        | 160 |
| 5.4.1   | Konfidenzintervalle                                                                                | 166 |
| 5.4.2   | Optimale Versuchspläne für Modell I                                                                | 169 |
| 5.4.3   | Hypothesenprüfung                                                                                  | 173 |
| 5.4.4   | Spezielle Probleme bei Modell II                                                                   | 176 |
| 5.5     | Mehrfache lineare Regression                                                                       | 177 |
| 5.5.1   | Parameterschätzung                                                                                 | 182 |
| 5.5.2   | Konfidenzintervalle und Tests                                                                      | 184 |
| 5.5.3   | Spezielle Probleme bei Modell II                                                                   | 186 |
| 5.5.4   | Optimale Versuchspläne für Modell I                                                                | 186 |
| 5.6     | Einfache polynomiale Regression                                                                    | 190 |
| 5.7     | Mehrfache quadratische Regression                                                                  | 199 |
| 5.8     | Eigentlich nichtlineare Regression                                                                 | 205 |
| 6.      | Theoretische Voraussetzungen und deren praktische Bedeutung - Robustheit von Verfahren             |     |

|                                                                                                                                      |     |
|--------------------------------------------------------------------------------------------------------------------------------------|-----|
| Anhang A Symbolik                                                                                                                    | 207 |
| Anhang B Vorausgesetzte Grundkenntnisse der Statistik                                                                                | 210 |
| B.1 Beschreibende Statistik                                                                                                          | 210 |
| B.1.1 Grundgesamtheit                                                                                                                | 210 |
| B.1.2 Populationsmittel und -varianz                                                                                                 | 210 |
| B.1.3 Grafische Beschreibung                                                                                                         | 212 |
| B.1.4 Faustregel                                                                                                                     | 214 |
| B.2 Häufigkeiten und Wahrscheinlichkeiten                                                                                            | 214 |
| B.2.1 Einleitung                                                                                                                     | 214 |
| B.2.2 Rechnen mit Häufigkeiten und Wahrscheinlichkeiten                                                                              | 215 |
| B.2.2.1 Eigenschaften relativer Häufigkeiten                                                                                         | 215 |
| B.2.2.2 Wahrscheinlichkeiten                                                                                                         | 218 |
| B.2.3 Wahrscheinlichkeitsverteilungen                                                                                                | 219 |
| B.2.3.1 Definitionen                                                                                                                 | 219 |
| B.2.3.2 Quantile                                                                                                                     | 225 |
| B.2.4 Der Erwartungswert                                                                                                             | 228 |
| B.2.5 Die Varianz                                                                                                                    | 230 |
| B.2.6 Die Kovarianz                                                                                                                  | 232 |
| B.3 Stichprobenverteilungen                                                                                                          | 234 |
| B.3.1 Das Stichprobenmittel $\bar{x}$                                                                                                | 234 |
| B.3.2 Die Stichprobenvarianz $s^2$                                                                                                   | 237 |
| Anhang C Matrizen                                                                                                                    | 239 |
| Tabellen                                                                                                                             | 244 |
| Tabelle A1 $P$ -Quantile der $t$ -Verteilung mit $f$ Freiheitsgraden (für $f = \infty$ , $P$ -Quantile der Standardnormalverteilung) | 244 |
| Tabelle A2 $P$ -Quantile der $\chi^2$ -Verteilung                                                                                    | 245 |
| Tabelle A3 95%-Quantile der $F$ -Verteilung                                                                                          | 247 |
| Tabelle A4 95%-Quantile der studentisierten Spannweite                                                                               | 249 |
| Tabelle A5 95%-Quantile für den zweiseitigen Dunnett-Test in einer optimalen Anlage                                                  | 251 |
| Tabelle A6 95%-Quantile für den zweiseitigen Dunnett-Test in einer balancierten Anlage                                               | 253 |
| Literatur                                                                                                                            | 255 |
| Sachwortverzeichnis                                                                                                                  | 258 |
